# Supplementary material for: Occasional sexual reproduction significantly affects the population structure of the widespread, predominantly asexually reproducing marine worm Lineus sanguineus (Nemertea: Pilidiophora)
Source: Springer Nature journal article supplement (doi:10.1007/s00227-022-04077-0), 2022-06-22
Supplement: 227_2022_4077_MOESM1_ESM.pdf [file 227_2022_4077_MOESM1_ESM.pdf]

**Supporting Information: Occasional sexual reproduction significantly affects the population structure of the widespread, predominantly asexually reproducing marine worm *Lineus sanguineus* (Nemertea: Piliidiophora)**

Christina Sagorny & Jörn von Döhren

**Supplementary Table 1** List of all included *Lineus sanguineus* specimens downloaded from. Sampling locality, region, number of specimens from one locality, GenBank accession numbers (COI & 16S), and reference are provided.

| Locality                | Region        | No. | COI accession numbers                  | 16S accession numbers | Reference                       |
|-------------------------|---------------|-----|----------------------------------------|-----------------------|---------------------------------|
| Anglesey, Wales         | NE Atlantic   | 1   | AJ436938                               | AJ436828              | Thollesson and Norenburg (2003) |
| Crosby, Wales           | NE Atlantic   | 1   | GU392025                               | -                     | Strand and Sundberg (2011)      |
| Rhos-on-Sea, Wales      | NE Atlantic   | 1   | KC812598                               | -                     | Strand et al. (2014)            |
| Penmon, Wales           | NE Atlantic   | 1   | KC812599                               | -                     | Strand et al. (2014)            |
| Dachangshan Dao, China  | NW Pacific    | 3   | KP213884- KP213886                     | -                     | Kang et al. (2015)              |
| Dagong Dao, China       | NW Pacific    | 26  | KP213887- KP213912                     | -                     | Kang et al. (2015)              |
| Daqin Dao, China        | NW Pacific    | 4   | KP213913- KP213916                     | -                     | Kang et al. (2015)              |
| Cantabria, Spain        | NE Atlantic   | 2   | KP213917, KP213918                     | -                     | Kang et al. (2015)              |
| Galicia, Spain          | NE Atlantic   | 3   | KP213919- KP213921                     | -                     | Kang et al. (2015)              |
| Asturias, Spain         | NE Atlantic   | 1   | KP213922                               | -                     | Kang et al. (2015)              |
| Lüshun, China           | NW Pacific    | 7   | KP213923- KP213926, KP213928- KP213930 | -                     | Kang et al. (2015)              |
| Lingshan Dao, China     | NW Pacific    | 14  | KP213931- KP213944                     | -                     | Kang et al. (2015)              |
| Nanaimo, Canada         | NE Pacific    | 29  | KP213945- KP213973                     | -                     | Kang et al. (2015)              |
| Nanchangshan Dao, China | NW Pacific    | 5   | KP213974- KP213978                     | -                     | Kang et al. (2015)              |
| Nuevo Gulf, Argentina   | SW Atlantic   | 4   | KP213979- KP213982                     | -                     | Kang et al. (2015)              |
| Naozhou Dao, China      | NW Pacific    | 1   | KP213983                               | -                     | Kang et al. (2015)              |
| Pingtian, China         | NW Pacific    | 8   | KP213984- KP213991                     | -                     | Kang et al. (2015)              |
| Shengsi, China          | NW Pacific    | 2   | KP213992, KP213993                     | -                     | Kang et al. (2015)              |
| Tofino, Canada          | NE Pacific    | 13  | KP213994- KP214006                     | -                     | Kang et al. (2015)              |
| Catalonia, Spain        | Mediterranean | 5   | KP214007- KP214011                     | -                     | Kang et al. (2015)              |
| Crosby, Wales           | NE Atlantic   | 8   | KR606035, KR606037- KR606043           | -                     | Kang et al. (2015)              |
| Rhos-on-Sea, Wales      | NE Atlantic   | 7   | KR606036, KR606044- KR606049           | -                     | Kang et al. (2015)              |
| Coquimbo, Chile         | SE Pacific    | 1   | KR606050                               | -                     | Kang et al. (2015)              |
| Totalillo, Chile        | SE Pacific    | 2   | KR606051, KR606052                     | -                     | Kang et al. (2015)              |
| Punta Tumbes, Chile     | SE Pacific    | 2   | KR606053- KR606055                     | -                     | Kang et al. (2015)              |
| Charleston, Oregon      | NE Pacific    | 3   | KU197836- KU197838                     | KU197552- KU197554    | Hiebert (2016)                  |
| Charleston, Oregon      | NE Pacific    | 1   | -                                      | KU197555              | Hiebert (2016)                  |

|                         |             |   |                                                                               |                                           |                                  |
|-------------------------|-------------|---|-------------------------------------------------------------------------------|-------------------------------------------|----------------------------------|
| Crosby, Wales           | NE Atlantic | 7 | KU840134, KU840237,<br>KU840239, KU840240,<br>KU840256, KU840257,<br>KU840259 | -                                         | Sundberg et al.<br>(2016)        |
| Penmon, Wales           | NE Atlantic | 2 | KU840236, KU840238                                                            | -                                         | Sundberg et al.<br>(2016)        |
| Rhos-on-Sea, Wales      | NE Atlantic | 8 | KU840262, KU840264-<br>KU840270                                               | -                                         | Sundberg et al.<br>(2016)        |
| Roscoff, France         | NE Atlantic | 6 | KX261775- KX261777,<br>KX261781- KX261783                                     | KX261723-KX261725,<br>KX261730- KX261732  | Ament-Velásquez<br>et al. (2016) |
| Buenos Aires, Argentina | SW Atlantic | 1 | -                                                                             | KX261729                                  | Ament-Velásquez<br>et al. (2016) |
| Buenos Aires, Argentina | SW Atlantic | 4 | MK047713-MK047716                                                             | MK067337-<br>MK067340                     | Zattara et al.<br>(2019)         |
| Roscoff, France         | NE Atlantic | 1 | MK047701                                                                      | MK067325                                  | Zattara et al.<br>(2019)         |
| Asturias, Spain         | NE Atlantic | 4 | MK047704-MK047707                                                             | MK067328-<br>MK067331                     | Zattara et al.<br>(2019)         |
| Kristineberg, Sweden    | North Sea   | 1 | MK047702                                                                      | MK067326                                  | Zattara et al.<br>(2019)         |
| Kaikoura, New Zealand   | SW Pacific  | 1 | MK047703                                                                      | MK067327                                  | Zattara et al.<br>(2019)         |
| Charleston, Oregon      | NE Pacific  | 3 | MK047708- MK047710                                                            | MK067332-<br>MK067334                     | Zattara et al.<br>(2019)         |
| Nahant, Massachusetts   | NW Atlantic | 2 | MK047711, MK047712                                                            | MK067335,<br>MK067336                     | Zattara et al.<br>(2019)         |
| Wales                   | NE Atlantic | 1 | -                                                                             | AF103761                                  | Sundberg and Saur<br>(1998)      |
| unknown                 | -           | 4 | -                                                                             | EF124915, EF124916,<br>EF178499, EF178500 |                                  |

**Supplementary Table 2** Bergen, winter conditions (9°C, 8h light). Number of specimens with head and number of fragments for the six months of the experiments are provided, in addition to the length of both regenerated specimens and fragments. The presence of gonads (G) at any time of the experiments is indicated (N = gonads absent, √ = gonads present, n.a. = not applicable).

| No.              | Month 1 |   | Month 2 |      | Month 3 |   | Month 4 |   | Month 5 |   | Month 6 |    |
|------------------|---------|---|---------|------|---------|---|---------|---|---------|---|---------|----|
|                  | Length  | G | Length  | G    | Length  | G | Length  | G | Length  | G | Length  | G  |
| 1                | 85      | √ | 110     | n.a. | 20      | √ | 88      | √ | 115     | N | 114     | N  |
| 2                | 150     | √ | 65      | n.a. | 35      | N | 94      | √ | 95      | √ | 95      | N  |
| 3                | 125     | √ | 100     | n.a. | 44      | N | 22      | N | 93      | N | 492     | √* |
| 4                | 75      | √ | 65      | n.a. | 64      | N | 110     | √ | 70      | N | 112     | N  |
| 5                | 75      | √ | 90      | n.a. | 25      | N | 23      | √ | 103     | √ | 135     | N  |
| 6                | 120     | √ | 95      | n.a. | 68      | N | 119     | √ | 80      | √ | 169     | √  |
| 7                | 100     | √ | 97      | n.a. | 68      | N | 93      | √ | 90      | N | 141     | √  |
| 8                | 80      | √ | 25      | n.a. | 80      | √ | 112     | N | 114     | N | 115     | N  |
| 9                | 90      | √ | 38      | n.a. | 70      | N | 110     | √ | 111     | √ | 140     | √  |
| 10               | 55      | √ | 95      | n.a. | 95      | √ | 60      | √ | 104     | √ | 120     | √  |
| 11               | 80      | √ | 90      | n.a. | 96      | √ | 132     | √ | 129     | N | 136     | √  |
| 12               | 65      | √ | 90      | n.a. | 95      | √ | 75      | N | 81      | √ | 81      | N  |
| 13               | 70      | √ | 89      | n.a. | 94      | √ | 88      | √ | 83      | √ | 40      | √  |
| 14               | 80      | N | 62      | n.a. | 83      | √ | 95      | √ | 38      | √ | 133     | √  |
| 15               | 80      | N | 80      | n.a. | 73      | √ | 100     | N | 25      | N | 120     | N  |
| 16               | 40      | √ | 130     | n.a. | 1105    | √ | 59      | √ | 45      | √ | 31      | N  |
| 17               | 45      | N | 75      | n.a. | 110     | √ | 105     | √ | 36      | N | 50      | √  |
| 18               | 90      | √ | 52      | n.a. | 93      | √ | 80      | √ | 29      | N | 23      | N  |
| 19               | 95      | √ | 63      | n.a. | 99      | √ | 13      | N | 19      | N | 32      | N  |
| 20               | 40      | N | 53      | n.a. |         |   |         |   | 97      | √ | 26      | N  |
| 21               |         |   | 80      | n.a. |         |   |         |   | 9       | N |         |    |
| 22               |         |   | 17      | n.a. |         |   |         |   | 9       | √ |         |    |
| <b>Fragments</b> |         |   |         |      |         |   |         |   |         |   |         |    |
| 1                |         |   | 42      | n.a. | 77      | √ | 5       | N | 54      | √ | 29      | √  |
| 2                |         |   | 11      | n.a. | 93      | √ | 3       | N | 32      | N | 12      | N  |
| 3                |         |   | 5       | n.a. | 40      | √ | 1.2     | N | 21      | N | 18      | N  |
| 4                |         |   |         |      | 37      | N | 1       | N | 23      | N | 20      | N  |
| 5                |         |   |         |      | 6       | N | 35      | N | 18      | √ | 15      | N  |
| 6                |         |   |         |      | 4       | √ | 7       | N | 25      | N | 9       | N  |
| 7                |         |   |         |      | 10      | N | 17      | N | 30      | √ | 3       | N  |
| 8                |         |   |         |      | 9       | N | 25      | N | 15      | √ | 15      | N  |
| 9                |         |   |         |      |         |   | 13      | √ | 7       | N | 18      | N  |
| 10               |         |   |         |      |         |   | 40      | N | 26      | √ | 8       | N  |
| 11               |         |   |         |      |         |   | 23      | N | 17      | N | 20      | N  |
| 12               |         |   |         |      |         |   | 33      | √ | 11      | N | 8       | N  |
| 13               |         |   |         |      |         |   | 35      | N | 8       | N | 15      | N  |
| 14               |         |   |         |      |         |   | 558     | √ | 8       | N | 3       | N  |
| 15               |         |   |         |      |         |   | 30      | N | 5       | N | 4       | N  |
| 16               |         |   |         |      |         |   | 5       | N | 4       | N | 6       | N  |
| 17               |         |   |         |      |         |   | 5       | N | 5       | √ | <1      | N  |
| 18               |         |   |         |      |         |   | 3       | N | 6       | N | <1      | N  |
| 19               |         |   |         |      |         |   | <1      | N | 2       | N | <1      | N  |
| 20               |         |   |         |      |         |   | <1      | N | <1      | N | 4       | N  |
| 21               |         |   |         |      |         |   | <1      | N | <1      | N | 6       | N  |

|    |  |  |  |  |  |  |    |   |  |  |    |   |
|----|--|--|--|--|--|--|----|---|--|--|----|---|
| 22 |  |  |  |  |  |  | <1 | N |  |  | 4  | N |
| 23 |  |  |  |  |  |  | <1 | N |  |  | 2  | N |
| 24 |  |  |  |  |  |  | <1 | N |  |  | <1 | √ |
| 25 |  |  |  |  |  |  | <1 | N |  |  | <1 | √ |
| 26 |  |  |  |  |  |  | <1 | N |  |  | 4  | N |
| 27 |  |  |  |  |  |  | <1 | N |  |  | 5  | N |

**Supplementary Table 3** Bergen, summer conditions (18°C, 16h light). Number of specimens with head and number of fragments for the six months of the experiments are provided, in addition to the length of both regenerated specimens and fragments. The presence of gonads (G) at any time of the experiments is indicated (N = gonads absent, √ = gonads present, n.a. = not applicable).

| No.              | Month 1 |   | Month 2 |      | Month 3 |   | Month 4 |   | Month 5 |      | Month 6 |   |
|------------------|---------|---|---------|------|---------|---|---------|---|---------|------|---------|---|
|                  | Length  | G | Length  | G    | Length  | G | Length  | G | Length  | G    | Length  | G |
| 1                | 120     | √ | 120     | n.a. | 136     | √ | 90      | N | 137     | n.a. | 141     | √ |
| 2                | 105     | √ | 120     | n.a. | 83      | N | 18      | N | 195     | n.a. | 210     | √ |
| 3                | 80      | √ | 122     | n.a. | 55      | N | 12      | N | 58      | n.a. | 131     | √ |
| 4                | 80      | √ | 87      | n.a. | 105     | √ | 11      | N | 50      | n.a. | 142     | √ |
| 5                | 60      | √ | 97      | n.a. | 93      | N | 7       | N | 21      | n.a. | 132     | √ |
| 6                | 105     | N | 84      | n.a. | 73      | N | 29      | N | 54      | n.a. | 138     | √ |
| 7                | 60      | N | 104     | n.a. | 78      | N | 53      | N | 45      | n.a. | 90      | N |
| 8                | 60      | N | 86      | n.a. | 117     | √ | 10      | N | 48      | n.a. | 96      | N |
| 9                | 60      | N | 145     | n.a. | 44      | N | 8       | N | 18      | n.a. | 116     | N |
| 10               | 75      | N | 132     | n.a. | 60      | N | 9       | N | 14      | n.a. | 81      | √ |
| 11               | 70      | √ | 57      | n.a. | 84      | N | 113     | N | 126     | n.a. | 67      | N |
| 12               | 65      | √ | 47      | n.a. | 103     | √ | 175     | N | 117     | n.a. | 62      | N |
| 13               | 75      | √ | 68      | n.a. | 123     | √ | 166     | N | 111     | n.a. | 52      | N |
| 14               | 55      | √ | 55      | n.a. | 125     | √ | 136     | N | 103     | n.a. | 47      | N |
| 15               | 80      | √ | 96      | n.a. | 122     | √ | 129     | √ | 80      | n.a. | 75      | N |
| 16               | 100     | √ | 134     | n.a. | 156     | √ | 110     | N | 138     | n.a. | 50      | N |
| 17               | 80      | √ | 118     | n.a. | 78      | N | 132     | N | 46      | n.a. | 37      | N |
| 18               | 70      | √ | 106     | n.a. | 127     | √ | 86      | N | 89      | n.a. | 32      | N |
| 19               | 10      | √ | 80      | n.a. | 68      | N | 110     | N | 23      | n.a. | 42      | N |
| 20               | 60      | N | 99      | n.a. | 90      | N | 45      | N | 142     | n.a. | 41      | N |
| 21               |         |   |         |      |         |   | 87      | N | 45      | n.a. | 12      | N |
| 22               |         |   |         |      |         |   | 65      | N | 92      | n.a. | 13      | N |
| 23               |         |   |         |      |         |   | 51      | N | 71      | n.a. | 10      | N |
| 24               |         |   |         |      |         |   | 52      | N |         |      | 20      | N |
| 25               |         |   |         |      |         |   | 54      | N |         |      | 13      | N |
| 26               |         |   |         |      |         |   | 33      | N |         |      | 10      | N |
| 27               |         |   |         |      |         |   | 37      | N |         |      | 12      | N |
| 28               |         |   |         |      |         |   | 43      | N |         |      | 14      | N |
| 29               |         |   |         |      |         |   |         |   |         |      | 13      | N |
| 30               |         |   |         |      |         |   |         |   |         |      | 7       | N |
| 31               |         |   |         |      |         |   |         |   |         |      | 3       | N |
| 32               |         |   |         |      |         |   |         |   |         |      | 3       | N |
| <b>Fragments</b> |         |   |         |      |         |   |         |   |         |      |         |   |
| 1                |         |   |         |      | 7       | N | 16      | N | 11      | n.a. | 21      | N |
| 2                |         |   |         |      | 7       | N | 5       | N | 12      | n.a. |         |   |
| 3                |         |   |         |      | 10      | N | 10      | N | 12      | n.a. |         |   |
| 4                |         |   |         |      | 10      | N | 20      | N | 10      | n.a. |         |   |
| 5                |         |   |         |      | 8       | N | 5       | N | 10      | n.a. |         |   |
| 6                |         |   |         |      |         |   | 9       | N | 5       | n.a. |         |   |
| 7                |         |   |         |      |         |   | 5       | N | 3       | n.a. |         |   |
| 8                |         |   |         |      |         |   | 6       | N | 9       | n.a. |         |   |
| 9                |         |   |         |      |         |   | 5       | N | 7       | n.a. |         |   |
| 10               |         |   |         |      |         |   | 5       | N | 7       | n.a. |         |   |
| 11               |         |   |         |      |         |   | 4       | N | 4       | n.a. |         |   |
| 12               |         |   |         |      |         |   | 3       | N | 5       | n.a. |         |   |
| 13               |         |   |         |      |         |   | 6       | N | 2       | n.a. |         |   |
| 14               |         |   |         |      |         |   | 5       | N | 3       | n.a. |         |   |

|    |  |  |  |  |  |  |    |   |    |      |  |  |
|----|--|--|--|--|--|--|----|---|----|------|--|--|
| 15 |  |  |  |  |  |  | 12 | N | 2  | n.a. |  |  |
| 16 |  |  |  |  |  |  | 4  | N | 22 | n.a. |  |  |
| 17 |  |  |  |  |  |  | 3  | N | 8  | n.a. |  |  |
| 18 |  |  |  |  |  |  | 30 | N | 3  | n.a. |  |  |
| 19 |  |  |  |  |  |  | 45 | N | 1  | n.a. |  |  |

## Supplementary References

- Ament-Velásquez SL, Figuet E, Ballenghien M, Zattara EE, Norenburg JL, Fernández-Álvarez FA, Bierne J, Bierne N, Galtier N (2016) Population genomics of sexual and asexual lineages in fissiparous ribbon worms (Lineus, Nemertea): hybridization, polyploidy and the Meselson effect. *Mol Ecol* 25(14):3356–3369. <https://doi.org/10.1111/mec.13717>
- Hiebert TC (2016) New Nemertean Diversity Discovered in the Northeast Pacific, Using Surveys of Both Planktonic Larvae and Benthic Adults. Ph.D, University of Oregon
- Kang X-X, Fernández-Álvarez FÁ, Alfaya JEF, Machordom A, Strand M, Sundberg P, Sun S-C (2015) Species Diversity of *Ramphogordius sanguineus*/*Lineus ruber*-Like Nemerteans (Nemertea: Heteronemertea) and Geographic Distribution of *R. sanguineus*. *Zool Sci* 32(6):579–589. <https://doi.org/10.2108/zs150064>
- Strand M, Herrera-Bachiller A, Nygren A, Kånneby T (2014) A new nemertean species: what are the useful characters for ribbon worm descriptions? *J. Mar. Biol. Ass.* 94(2):317–330. <https://doi.org/10.1017/S002531541300146X>
- Strand M, Sundberg P (2011) A DNA-based description of a new nemertean (phylum Nemertea) species. *Mar Biol Res* 7(1):63–70. <https://doi.org/10.1080/17451001003713563>
- Sundberg P, Kvist S, Strand M (2016) Evaluating the Utility of Single-Locus DNA Barcoding for the Identification of Ribbon Worms (Phylum Nemertea). *PLOS ONE* 11(5):e0155541. <https://doi.org/10.1371/journal.pone.0155541>
- Sundberg P, Saur M (1998) Molecular phylogeny of some European heteronemertean (Nemertea) species and the monophyletic status of *Riseriellus*, *Lineus*, and *Micrura*. *Mol Phylogenet Evol* 10(3):271–280. <https://doi.org/10.1006/mpev.1998.0543>
- Thollesson M, Norenburg JL (2003) Ribbon worm relationships: a phylogeny of the phylum Nemertea. *Proc Royal Soc B* 270(1513):407–415. <https://doi.org/10.1098/rspb.2002.2254>
- Zattara EE, Fernandez-Alvarez FA, Hiebert TC, Bely AE, Norenburg JL (2019) A phylum-wide survey reveals multiple independent gains of head regeneration ability in Nemertea. *Proc Royal Soc B*:20182524. <https://doi.org/10.1098/rspb.2018.2524>
